# Supplementary material for: Associations of Exposure to Nitrogen Oxides with Prevalent Asthma and Other Atopic Diseases in Israel
Source: MDPI journal article supplement (doi:10.3390/environments8100110), 2021-10-19
Supplement: s1 [file s1]

**Table S1.** Main Characteristics of the Population by quintiles of exposure to NOx.

| <b>Characteristic</b>        | <b>Quintile 1<br/>n (%)</b> | <b>Quintile 2<br/>n (%)</b> | <b>Quintile 3<br/>n (%)</b> | <b>Quintile 4<br/>n (%)</b> | <b>Quintile 5<br/>n (%)</b> |
|------------------------------|-----------------------------|-----------------------------|-----------------------------|-----------------------------|-----------------------------|
| <b>N</b>                     | 466,042                     | 467,242                     | 469,614                     | 465,901                     | 463,367                     |
| <b>Median exposure (ppb)</b> | 3.8                         | 8.0                         | 12.7                        | 16.8                        | 13.4                        |
| <b>Male sex</b>              | 301,583<br>(64.7)           | 274,550<br>(58.8)           | 270,447<br>(57.6)           | 264,817<br>(56.8)           | 266,636<br>(57.5)           |
| <b>Decade of birth</b>       |                             |                             |                             |                             |                             |
| 1947-1959                    | 252,702<br>(54.2)           | 24,323<br>(5.2)             | 5,626<br>(1.2)              | 362<br>(0.1)                | 50<br>(<0.02)               |
| 1960-1979                    | 211,303<br>(45.3)           | 403,415<br>(86.3)           | 184,383<br>(39.3)           | 56,791<br>(12.2)            | 63,667<br>(13.7)            |
| 1980-1989                    | 1,268<br>(0.3)              | 28,217<br>(6.0)             | 157,996<br>(33.6)           | 189,845<br>(40.7)           | 165,960<br>(35.8)           |
| 1990-2001                    | 769<br>(0.2)                | 11,287<br>(2.4)             | 121,609<br>(25.9)           | 218,903<br>(47.0)           | 233,720<br>(50.4)           |
| <b>School Orientation</b>    |                             |                             |                             |                             |                             |
| Secular                      | 256,547<br>(55.0)           | 376,068<br>(80.5)           | 391,980<br>(83.5)           | 387,371<br>(83.1)           | 380,224<br>(82.1)           |
| Religious                    | 5,816<br>(1.2)              | 30,199<br>(6.5)             | 45,791<br>(9.8)             | 50,716<br>(10.9)            | 49,541<br>(10.7)            |
| Ultra-orthodox               | 3,293<br>(0.7)              | 8,533<br>(1.8)              | 10,02<br>(2.1)              | 8,723<br>(1.9)              | 8,998<br>(1.9)              |
| Missing                      | 200,386<br>(43.0)           | 52,442<br>(11.2)            | 21,818<br>(4.6)             | 19,091<br>(4.1)             | 24,604<br>(5.3)             |
| <b>SES quintile</b>          |                             |                             |                             |                             |                             |
| 1                            | 95,826<br>(20.6)            | 101,133<br>(21.6)           | 89,689<br>(19.1)            | 81,815<br>(17.6)            | 102,738<br>(22.2)           |
| 2                            | 90,468<br>(19.4)            | 89,669<br>(19.2)            | 84,348<br>(18.0)            | 85,832<br>(18.4)            | 94,675<br>(20.4)            |
| 3                            | 88,767<br>(19.0)            | 86,965<br>(18.6)            | 90,512<br>(19.3)            | 97,294<br>(20.9)            | 95,871<br>(20.7)            |
| 4                            | 92,603<br>(19.9)            | 87,479<br>(18.7)            | 96,077<br>(20.5)            | 98,154<br>(21.1)            | 90,009<br>(19.4)            |
| 5                            | 90,749<br>(19.5)            | 96,699<br>(20.7)            | 105,063<br>(22.4)           | 100,343<br>(21.5)           | 78,462<br>(16.9)            |
| Missing                      | 7,629<br>(1.6)              | 5,297<br>(1.1)              | 3,925<br>(0.8)              | 2,463<br>(0.5)              | 1,612<br>(0.3)              |
